# Supplementary material for: Genome-Wide Evolution and Comparative Analysis of Superoxide Dismutase Gene Family in Cucurbitaceae and Expression Analysis of Lagenaria siceraria Under Multiple Abiotic Stresses
Source: Front Genet. 2022 Feb 8;12:784878. doi: 10.3389/fgene.2021.784878 (PMC8861505; doi:10.3389/fgene.2021.784878)
Supplement: Supplementary file 1 [file Table3.XLSX]

## Sheet: Chr Location
Table S3. List of Chromosome Size and Location SOD genes family in five Cucurbitaceae species
Gene ID	Given Name	Location of Chr	Start	End
Citrullus lanatus
Cla97C02G042100	ClaSOD1	chr02	29948445	29950669
Cla97C02G047680	ClaSOD2	chr02	35322076	35324272
Cla97C03G050910	ClaSOD3	chr03	139505	141152
Cla97C03G066780	ClaSOD4	chr03	30312007	30314020
Cla97C03G067030	ClaSOD5	chr03	30528549	30533620
Cla97C04G071940	ClaSOD6	chr04	18573541	18578453
Cla97C07G144240	ClaSOD7	chr07	31684506	31689090
Cla97C10G187890	ClaSOD8	chr10	3896864	3901567
Lagenaria siceraria
Lsi01G016730	LsiSOD1	chr01	15271445	15282791
Lsi02G012110	LsiSOD2	chr02	15632093	15637204
Lsi06G001600	LsiSOD3	chr06	1710508	1716036
Lsi06G001840	LsiSOD4	chr06	1985233	1988789
Lsi07G001390	LsiSOD5	chr07	1509250	1514918
Lsi07G013670	LsiSOD6	chr07	19864738	19869384
Lsi10G012210	LsiSOD7	chr10	16499663	16504945
Lsi11G004820	LsiSOD8	chr11	5089329	5093919
Cucurbita pepo
Cp4.1LG00g08890	CpSOD1	Chr00	28028303	28029262
Cp4.1LG00g09240	CpSOD2	Chr00	28935603	28939259
Cp4.1LG00g14260	CpSOD3	Chr00	40154671	40154916
Cp4.1LG01g03240	CpSOD4	Chr01	1895226	1898870
Cp4.1LG02g11270	CpSOD5	Chr02	10254434	10257174
Cp4.1LG05g02890	CpSOD6	Chr05	2231666	2235398
Cp4.1LG08g07900	CpSOD7	Chr08	6239723	6243844
Cp4.1LG08g10810	CpSOD8	Chr08	8243139	8245026
Cp4.1LG11g09200	CpSOD9	Chr11	7718961	7722186
Cp4.1LG20g07540	CpSOD10	Chr20	8063773	8066502
Cucumis melo
MELO3C015351	MelSOD1	Chr03	939817	945698
MELO3C015374	MelSOD2	Chr03	1118806	1121921
MELO3C004342	MelSOD3	Chr06	26463969	26468392
MELO3C014007	MelSOD4	Chr07	33681877	33685813
MELO3C017624	MelSOD5	Chr08	23381233	23385936
MELO3C008809	MelSOD6	Chr09	25082114	25086426
MELO3C026955	MelSOD7	Chr012	26663854	26666460
MELO3C020487	MelSOD8	Chr013	190600	193821
Cucumis sativus
CsaV3_1G004740	CsaSOD1	chr1	3003867	3008300
CsaV3_1G039270	CsaSOD2	chr1	24721159	24727725
CsaV3_1G039510	CsaSOD3	chr1	24887778	24891484
CsaV3_2G004490	CsaSOD4	chr2	2426642	2430658
CsaV3_3G003410	CsaSOD5	chr3	2831528	2835234
CsaV3_4G004420	CsaSOD6	chr4	2773638	2778314
CsaV3_4G013220	CsaSOD7	chr4	9576323	9582309
CsaV3_6G014400	CsaSOD8	chr6	10443370	10447636
CsaV3_6G002070	CsaSOD9	chr6	1422605	1422919
