# Supplementary material for: Genome-Wide Evolution and Comparative Analysis of Superoxide Dismutase Gene Family in Cucurbitaceae and Expression Analysis of Lagenaria siceraria Under Multiple Abiotic Stresses
Source: Front Genet. 2022 Feb 8;12:784878. doi: 10.3389/fgene.2021.784878 (PMC8861505; doi:10.3389/fgene.2021.784878)
Supplement: Supplementary file 3 [file Table9.XLSX]

## Sheet: SIMILARITY RESULTS
Table S9. Pairwise protein-protein identity and similarity from multiple sequence alignments
ClaSOD1	1
ClaSOD2	0.1432	1
ClaSOD3	0.1762	0.1504	1
ClaSOD4	0.03	0.0386	0.0272	1
ClaSOD5	0.0487	0.0415	0.0415	0.1318	1
ClaSOD6	0.1404	0.1332	0.1489	0.0315	0.0444	1
ClaSOD7	0.03	0.0372	0.0272	0.2077	0.1232	0.0286	1
ClaSOD8	0.0558	0.0716	0.0558	0.0515	0.0515	0.0544	0.0659	1
CpSOD1	0.1146	0.1131	0.1189	0.0243	0.0343	0.159	0.0229	0.0429	1
CpSOD2	0.1733	0.1332	0.1575	0.03	0.0472	0.1318	0.03	0.0558	0.1045	1
CpSOD3	0.0659	0.0444	0.0616	0.0114	0.0171	0.0515	0.0114	0.02	0.053	0.0487	1
CpSOD4	0.03	0.0329	0.0272	0.2063	0.1232	0.0286	0.3882	0.0702	0.0229	0.03	0.0114	1
CpSOD5	0.0472	0.0401	0.0401	0.1332	0.3266	0.0429	0.1246	0.0544	0.0329	0.0458	0.0157	0.1246	1
CpSOD6	0.1489	0.2851	0.1532	0.0429	0.0444	0.1389	0.0386	0.073	0.1146	0.1375	0.0444	0.0401	0.0429	1
CpSOD7	0.0501	0.0644	0.0501	0.0544	0.053	0.053	0.0601	0.4126	0.0401	0.0573	0.0171	0.063	0.0544	0.063	1
CpSOD8	0.1747	0.1532	0.1991	0.0272	0.0415	0.1446	0.0286	0.0515	0.116	0.1575	0.0544	0.0286	0.0401	0.159	0.0444	1
CpSOD9	0.1246	0.1203	0.1303	0.0343	0.0515	0.1805	0.0444	0.0744	0.1704	0.116	0.053	0.0444	0.0501	0.1246	0.073	0.1275	1
CpSOD10	0.0358	0.0315	0.03	0.1217	0.2951	0.0329	0.1117	0.0444	0.0315	0.0386	0.0128	0.1131	0.2879	0.0329	0.0458	0.0315	0.0444	1
CsaSOD1	0.0487	0.0429	0.0415	0.1361	0.3252	0.0458	0.1275	0.0515	0.0358	0.0472	0.0171	0.1246	0.318	0.0458	0.0544	0.0415	0.053	0.2893	1
CsaSOD2	0.0343	0.0372	0.03	0.3553	0.1303	0.0358	0.2034	0.0544	0.0272	0.0329	0.0114	0.2005	0.1303	0.0415	0.0573	0.03	0.0386	0.1203	0.1346	1
CsaSOD3	0.1747	0.1489	0.2091	0.0286	0.0429	0.1461	0.0286	0.0558	0.1174	0.1561	0.0616	0.0286	0.0415	0.1561	0.0501	0.1977	0.1289	0.0315	0.0415	0.0315	1
CsaSOD4	0.2077	0.1461	0.1805	0.0286	0.0487	0.1418	0.0286	0.0601	0.1131	0.179	0.0659	0.0286	0.0472	0.1504	0.0544	0.179	0.1246	0.0358	0.0487	0.0315	0.179	1
CsaSOD5	0.0444	0.0544	0.0458	0.0415	0.0358	0.0487	0.0329	0.1905	0.0386	0.0372	0.0171	0.0372	0.0372	0.0573	0.1776	0.0401	0.0587	0.0329	0.0372	0.0401	0.0458	0.0458	1
CsaSOD6	0.03	0.0372	0.0272	0.2063	0.126	0.0286	0.4054	0.0673	0.0229	0.03	0.0114	0.3796	0.1275	0.0401	0.0644	0.0286	0.0429	0.1146	0.1289	0.202	0.0286	0.0286	0.0315	1
CsaSOD7	0.1432	0.1318	0.1461	0.0329	0.0458	0.2148	0.03	0.0515	0.1618	0.1361	0.0515	0.03	0.0444	0.1375	0.0515	0.1446	0.1833	0.0343	0.0472	0.0372	0.1446	0.1446	0.0458	0.03	1
CsaSOD8	0.1432	0.2879	0.1547	0.0415	0.0472	0.1361	0.0429	0.0802	0.1117	0.1346	0.0458	0.0415	0.0458	0.2865	0.0673	0.1575	0.1217	0.0358	0.0487	0.0415	0.1518	0.1461	0.0544	0.0429	0.1346	1
CsaSOD9	0.0128	0.0157	0.01	0.02	0.0214	0.0157	0.0186	0.0272	0.0143	0.0128	0.01	0.0186	0.0229	0.0157	0.0272	0.0128	0.0143	0.0214	0.0229	0.02	0.0114	0.0114	0.0157	0.0171	0.0143	0.0157	1
LsiSOD1	0.0558	0.0487	0.0515	0.0343	0.0329	0.0601	0.0372	0.0515	0.0487	0.0515	0.0229	0.0358	0.0329	0.0501	0.0544	0.053	0.1604	0.0329	0.0343	0.0372	0.0515	0.0544	0.0501	0.0401	0.0644	0.0487	0.02	1
LsiSOD2	0.0487	0.0401	0.0415	0.1318	0.318	0.0444	0.1275	0.0558	0.0343	0.0472	0.0171	0.1246	0.3123	0.0429	0.0544	0.0415	0.0558	0.2793	0.3108	0.1303	0.0429	0.0487	0.0386	0.1303	0.0458	0.0472	0.0214	0.0372	1
LsiSOD3	0.03	0.0415	0.0272	0.308	0.1117	0.0343	0.1805	0.0487	0.0243	0.0286	0.0114	0.1805	0.1131	0.0444	0.0515	0.0272	0.0458	0.1002	0.1146	0.2979	0.0286	0.0272	0.0429	0.179	0.0358	0.0429	0.02	0.0343	0.116	1
LsiSOD4	0.1762	0.1518	0.2091	0.0272	0.0429	0.1475	0.0286	0.0573	0.1174	0.1561	0.0601	0.0286	0.0415	0.1561	0.0501	0.1977	0.1289	0.0315	0.0429	0.03	0.2048	0.1805	0.0458	0.0286	0.1461	0.1575	0.0128	0.0515	0.0429	0.0272	1
LsiSOD5	0.0257	0.0343	0.0243	0.1891	0.106	0.0257	0.3982	0.0544	0.0229	0.0257	0.0114	0.3681	0.1074	0.0343	0.0501	0.0257	0.0429	0.0945	0.1074	0.1833	0.0257	0.0243	0.03	0.3868	0.0272	0.0372	0.0186	0.0315	0.1103	0.1719	0.0257	1
LsiSOD6	0.0558	0.0716	0.0558	0.0515	0.0515	0.0558	0.0644	0.4312	0.0444	0.0515	0.02	0.0673	0.0544	0.073	0.3954	0.0515	0.0759	0.0444	0.0501	0.0558	0.0558	0.0601	0.1876	0.0673	0.053	0.0773	0.0272	0.053	0.053	0.053	0.0573	0.053	1
LsiSOD7	0.1475	0.2879	0.1532	0.0386	0.0472	0.1375	0.0444	0.0759	0.1131	0.1375	0.0444	0.0372	0.0458	0.2893	0.0644	0.159	0.1232	0.0358	0.0487	0.0401	0.1561	0.1504	0.0573	0.0444	0.1361	0.2936	0.0157	0.0501	0.0472	0.0401	0.1561	0.0386	0.0773	1
LsiSOD8	0.2005	0.1475	0.1719	0.03	0.0458	0.1318	0.0272	0.0601	0.1117	0.1704	0.0659	0.0272	0.0444	0.1461	0.0515	0.1719	0.1217	0.0343	0.0458	0.0329	0.1704	0.2048	0.0429	0.0272	0.1346	0.1418	0.0128	0.0558	0.0458	0.0286	0.1719	0.0257	0.0601	0.1461	1
MelSOD1	0.0329	0.0415	0.0286	0.3581	0.1332	0.0372	0.2048	0.0515	0.0286	0.0315	0.01	0.2034	0.1346	0.0472	0.0558	0.03	0.0401	0.1232	0.1375	0.3724	0.03	0.03	0.0386	0.2034	0.0386	0.0458	0.02	0.0372	0.1332	0.3008	0.03	0.1848	0.053	0.0444	0.0315	1
MelSOD2	0.1704	0.1489	0.1977	0.03	0.0429	0.1389	0.03	0.0573	0.1174	0.1518	0.0601	0.03	0.0415	0.1489	0.0472	0.1876	0.1275	0.0315	0.0415	0.0315	0.202	0.1747	0.0458	0.03	0.1375	0.1475	0.01	0.0501	0.0429	0.03	0.1919	0.0257	0.0573	0.1489	0.1819	0.03	1
MelSOD3	0.1762	0.1246	0.1547	0.0257	0.0401	0.1275	0.0243	0.0544	0.1103	0.1475	0.0673	0.0243	0.0386	0.1246	0.0487	0.1504	0.1174	0.03	0.0401	0.0272	0.1547	0.1819	0.0415	0.0243	0.1289	0.1189	0.0128	0.0472	0.0401	0.0272	0.1547	0.0243	0.0544	0.1246	0.1819	0.0257	0.1561	1
MelSOD4	0.0573	0.073	0.0587	0.0544	0.0587	0.0558	0.0644	0.4197	0.0429	0.0544	0.0186	0.0673	0.0601	0.0773	0.3882	0.0544	0.0773	0.0515	0.0558	0.0573	0.0587	0.0616	0.1977	0.0659	0.053	0.0802	0.0272	0.0573	0.0616	0.0515	0.0601	0.0515	0.4197	0.0773	0.0587	0.0558	0.0573	0.053	1
MelSOD5	0.0257	0.03	0.0229	0.1905	0.1088	0.0243	0.381	0.0573	0.02	0.0272	0.0114	0.3495	0.1103	0.0315	0.0558	0.0243	0.0372	0.1002	0.1131	0.1862	0.0243	0.0257	0.0315	0.404	0.0257	0.0343	0.0157	0.0343	0.1146	0.169	0.0243	0.3753	0.0558	0.0343	0.0229	0.1876	0.0214	0.0214	0.0558	1
MelSOD6	0.1432	0.1318	0.1461	0.0315	0.0444	0.2134	0.0286	0.0515	0.1604	0.1361	0.0515	0.0286	0.0429	0.1375	0.053	0.1446	0.1819	0.0329	0.0458	0.0358	0.1446	0.1446	0.0458	0.0286	0.2206	0.1346	0.0143	0.0644	0.0444	0.0343	0.1461	0.0257	0.053	0.1361	0.1346	0.0372	0.1375	0.1289	0.053	0.0243	1
MelSOD7	0.1418	0.2922	0.1475	0.0386	0.0415	0.1303	0.0415	0.0773	0.1117	0.1318	0.0444	0.0372	0.0401	0.2808	0.0659	0.1518	0.1174	0.03	0.0429	0.0372	0.1475	0.1432	0.0544	0.0415	0.1289	0.2979	0.0143	0.0487	0.0415	0.0415	0.1504	0.0372	0.0759	0.2865	0.1446	0.0415	0.1504	0.1217	0.0773	0.0329	0.1289	1
MelSOD8	0.0487	0.0515	0.0415	0.1275	0.2836	0.0444	0.1203	0.0544	0.0343	0.0472	0.0171	0.1189	0.2779	0.0515	0.0601	0.0415	0.0515	0.2507	0.2951	0.1232	0.0429	0.0487	0.0401	0.126	0.0458	0.0558	0.0214	0.0415	0.2836	0.1146	0.0429	0.1031	0.0544	0.0644	0.0458	0.126	0.0444	0.0401	0.0616	0.1074	0.0444	0.0501	1
	ClaSOD1	ClaSOD2	ClaSOD3	ClaSOD4	ClaSOD5	ClaSOD6	ClaSOD7	ClaSOD8	CpSOD1	CpSOD2	CpSOD3	CpSOD4	CpSOD5	CpSOD6	CpSOD7	CpSOD8	CpSOD9	CpSOD10	CsaSOD1	CsaSOD2	CsaSOD3	CsaSOD4	CsaSOD5	CsaSOD6	CsaSOD7	CsaSOD8	CsaSOD9	LsiSOD1	LsiSOD2	LsiSOD3	LsiSOD4	LsiSOD5	LsiSOD6	LsiSOD7	LsiSOD8	MelSOD1	MelSOD2	MelSOD3	MelSOD4	MelSOD5	MelSOD6	MelSOD7	MelSOD8
		SIMILARITY STATS
		min = 1
		max = 100
		mean = 10.7904272579773
		stddev = 15.7805242009757

## Sheet: IDENTITY RESULTS
IDENTITY RESULTS
ClaSOD1	1
ClaSOD2	0.8094	1
ClaSOD3	0.9398	0.8151	1
ClaSOD4	0.6232	0.6174	0.6203	1
ClaSOD5	0.6747	0.6289	0.669	0.6977	1
ClaSOD6	0.8868	0.7908	0.8997	0.6146	0.669	1
ClaSOD7	0.573	0.5687	0.5716	0.7148	0.6547	0.5673	1
ClaSOD8	0.5644	0.5716	0.5673	0.5515	0.553	0.5544	0.5343	1
CpSOD1	0.8681	0.7822	0.8724	0.6232	0.6733	0.9226	0.5702	0.5472	1
CpSOD2	0.934	0.7865	0.9025	0.6131	0.6575	0.8696	0.5587	0.563	0.8495	1
CpSOD3	0.8481	0.7277	0.8409	0.6203	0.6647	0.8108	0.5659	0.5372	0.8638	0.8108	1
CpSOD4	0.5859	0.5759	0.5845	0.722	0.6647	0.5802	0.9383	0.5458	0.583	0.5716	0.5787	1
CpSOD5	0.6733	0.626	0.6676	0.6991	0.9842	0.6676	0.6547	0.5558	0.6719	0.6561	0.6633	0.6647	1
CpSOD6	0.8137	0.9641	0.8166	0.6174	0.6275	0.7922	0.5659	0.5716	0.7779	0.7908	0.722	0.5773	0.6246	1
CpSOD7	0.5702	0.5659	0.5744	0.5472	0.553	0.5616	0.53	0.934	0.553	0.5716	0.5458	0.5415	0.5558	0.5644	1
CpSOD8	0.9383	0.8194	0.9813	0.6217	0.669	0.8954	0.5716	0.5644	0.8696	0.9025	0.8338	0.5845	0.6676	0.8223	0.5702	1
CpSOD9	0.3438	0.2478	0.3495	0.1618	0.2091	0.4111	0.1676	0.1532	0.4068	0.3252	0.2793	0.1676	0.2077	0.2507	0.1575	0.3467	1
CpSOD10	0.669	0.6217	0.6633	0.6891	0.9555	0.6661	0.6475	0.5487	0.6991	0.6547	0.6891	0.659	0.9412	0.6203	0.5487	0.6633	0.2048	1
CsaSOD1	0.6647	0.6303	0.659	0.6977	0.977	0.6604	0.6575	0.553	0.6647	0.6475	0.6547	0.6633	0.9641	0.6289	0.553	0.659	0.2005	0.9369	1
CsaSOD2	0.626	0.6189	0.6232	0.9627	0.6919	0.6174	0.7134	0.553	0.626	0.616	0.6203	0.7206	0.6934	0.6189	0.5501	0.6246	0.1647	0.6833	0.6919	1
CsaSOD3	0.9369	0.8166	0.9885	0.6217	0.669	0.8968	0.5716	0.5644	0.871	0.9011	0.8409	0.5845	0.6676	0.8194	0.573	0.9785	0.3481	0.6633	0.659	0.6246	1
CsaSOD4	0.9813	0.8065	0.9412	0.6217	0.6733	0.8911	0.5716	0.5702	0.8696	0.9398	0.8438	0.5845	0.6719	0.8108	0.5744	0.9398	0.3452	0.6676	0.6633	0.6246	0.9383	1
CsaSOD5	0.6575	0.6217	0.6604	0.5931	0.6002	0.6475	0.553	0.7063	0.6461	0.6389	0.6747	0.5659	0.6017	0.6246	0.7005	0.6575	0.2063	0.606	0.5974	0.5916	0.659	0.659	1
CsaSOD6	0.553	0.5573	0.5515	0.6948	0.6346	0.5472	0.9412	0.52	0.5501	0.5386	0.5458	0.9068	0.6346	0.5558	0.5157	0.5515	0.1461	0.6289	0.6361	0.6919	0.5515	0.5515	0.5358	1
CsaSOD7	0.8925	0.7922	0.8982	0.616	0.669	0.9799	0.5687	0.5487	0.9226	0.8753	0.8137	0.5816	0.6676	0.7936	0.5587	0.8968	0.4111	0.6661	0.6604	0.6189	0.8968	0.8939	0.6418	0.5487	1
CsaSOD8	0.8037	0.9613	0.8137	0.6174	0.6289	0.7879	0.5687	0.5802	0.7736	0.7851	0.7191	0.5773	0.626	0.9584	0.5673	0.8166	0.2464	0.6232	0.6303	0.6189	0.8123	0.8051	0.6203	0.5587	0.7893	1
CsaSOD9	0.7865	0.6948	0.7836	0.6203	0.6676	0.7793	0.5644	0.5401	0.8295	0.7707	0.871	0.5773	0.669	0.6891	0.5501	0.7836	0.2449	0.6948	0.659	0.6203	0.7836	0.7865	0.6618	0.5429	0.7808	0.6848	1
LsiSOD1	0.4541	0.3538	0.4512	0.3323	0.3553	0.4527	0.3223	0.2979	0.4441	0.4355	0.4369	0.3323	0.3567	0.3538	0.3094	0.4527	0.3438	0.3553	0.3467	0.3338	0.4512	0.4512	0.3882	0.3037	0.4527	0.3495	0.4326	1
LsiSOD2	0.5931	0.5458	0.5873	0.626	0.8997	0.5873	0.6203	0.5143	0.5916	0.5759	0.583	0.6189	0.8882	0.5444	0.5114	0.5873	0.1919	0.8567	0.881	0.6203	0.5873	0.5916	0.553	0.6002	0.5873	0.5472	0.5859	0.3223	1
LsiSOD3	0.6174	0.6131	0.6131	0.8997	0.6747	0.6117	0.6862	0.5487	0.6131	0.6045	0.6103	0.6948	0.6776	0.6131	0.5487	0.6146	0.169	0.6661	0.6733	0.8853	0.6146	0.6131	0.5816	0.6647	0.6117	0.6117	0.6103	0.3223	0.606	1
LsiSOD4	0.9383	0.8194	0.9899	0.6203	0.669	0.8982	0.5716	0.5673	0.8724	0.9011	0.8395	0.5845	0.6676	0.8209	0.573	0.9785	0.3495	0.6633	0.659	0.6232	0.9828	0.9398	0.6604	0.5515	0.8968	0.818	0.7851	0.4512	0.5873	0.6131	1
LsiSOD5	0.5845	0.5873	0.5859	0.7034	0.6404	0.5802	0.957	0.5272	0.5959	0.5716	0.5916	0.9183	0.6404	0.5802	0.5229	0.5859	0.1676	0.6318	0.6389	0.702	0.5859	0.5845	0.5573	0.9226	0.5816	0.583	0.5902	0.3252	0.606	0.6819	0.5859	1
LsiSOD6	0.5386	0.5458	0.5429	0.5171	0.52	0.5315	0.5	0.9126	0.5243	0.5257	0.5128	0.5114	0.5229	0.5458	0.8753	0.5401	0.1289	0.5157	0.5186	0.52	0.5401	0.5444	0.6819	0.4985	0.5257	0.5472	0.5186	0.275	0.4785	0.5171	0.5429	0.4928	1
LsiSOD7	0.7836	0.9398	0.7922	0.5931	0.6074	0.7636	0.5501	0.5515	0.7507	0.7621	0.6948	0.5544	0.6045	0.9369	0.5415	0.7979	0.2234	0.6002	0.6088	0.5959	0.7965	0.7822	0.5988	0.5501	0.765	0.9412	0.6604	0.328	0.5257	0.5888	0.7965	0.563	0.5472	1
LsiSOD8	0.9541	0.7822	0.9083	0.6189	0.6661	0.8581	0.563	0.5673	0.8395	0.9068	0.8209	0.5759	0.6647	0.7836	0.5716	0.9083	0.3409	0.6604	0.6561	0.6203	0.9054	0.9541	0.6504	0.5429	0.8638	0.7779	0.7593	0.4469	0.5845	0.616	0.9068	0.5673	0.5415	0.7564	1
MelSOD1	0.6246	0.6217	0.6217	0.9627	0.6962	0.6174	0.7148	0.553	0.626	0.6146	0.6189	0.722	0.6977	0.6232	0.5501	0.6246	0.1647	0.6876	0.6962	0.9813	0.6232	0.6232	0.5916	0.6934	0.6189	0.6217	0.6203	0.3338	0.6246	0.8853	0.6232	0.7034	0.52	0.5988	0.6189	1
MelSOD2	0.9068	0.7879	0.9484	0.6146	0.6618	0.8653	0.5644	0.5644	0.8424	0.8696	0.8108	0.5773	0.6604	0.7865	0.5702	0.9398	0.3467	0.6561	0.6518	0.616	0.9527	0.9068	0.6504	0.5444	0.8653	0.7822	0.755	0.4441	0.5802	0.6174	0.9412	0.5687	0.5401	0.7636	0.9126	0.6146	1
MelSOD3	0.9527	0.7893	0.9183	0.6189	0.669	0.8796	0.5687	0.5644	0.8911	0.9083	0.8724	0.5816	0.6676	0.7865	0.5702	0.9154	0.3381	0.6762	0.659	0.6203	0.9169	0.9627	0.659	0.5487	0.8839	0.7779	0.8123	0.4484	0.5873	0.6117	0.9169	0.5916	0.5386	0.7578	0.9326	0.6189	0.8896	1
MelSOD4	0.5329	0.5415	0.5386	0.5157	0.5214	0.5286	0.4985	0.8911	0.5186	0.52	0.5071	0.51	0.5243	0.5429	0.8595	0.5358	0.1303	0.5157	0.52	0.5171	0.5358	0.5372	0.6876	0.4828	0.5229	0.5444	0.5143	0.2765	0.4799	0.5143	0.5386	0.4899	0.871	0.5186	0.5343	0.5171	0.5358	0.5315	1
MelSOD5	0.5802	0.5787	0.5787	0.702	0.6404	0.573	0.9355	0.53	0.5816	0.5673	0.5845	0.8954	0.6404	0.5759	0.5257	0.5787	0.1604	0.6404	0.6418	0.6977	0.5787	0.5802	0.5601	0.9469	0.5744	0.5787	0.5816	0.3223	0.606	0.6776	0.5787	0.9441	0.4942	0.5573	0.5601	0.6991	0.5601	0.5773	0.4928	1
MelSOD6	0.8896	0.7893	0.8982	0.6146	0.6676	0.9813	0.5673	0.5487	0.9212	0.8724	0.8123	0.5802	0.6661	0.7908	0.5601	0.8968	0.4097	0.6647	0.659	0.6174	0.8968	0.8911	0.6418	0.5472	0.9928	0.7865	0.7793	0.4527	0.5859	0.6103	0.8968	0.5802	0.5257	0.7621	0.861	0.6174	0.8653	0.881	0.5229	0.573	1
MelSOD7	0.808	0.9756	0.8137	0.6146	0.6289	0.7893	0.5687	0.5759	0.7808	0.7851	0.7263	0.5773	0.626	0.9555	0.5673	0.818	0.2464	0.6232	0.6303	0.616	0.8151	0.8051	0.6217	0.5587	0.7908	0.9742	0.6934	0.3538	0.5472	0.6103	0.818	0.5873	0.5487	0.9355	0.7808	0.6189	0.7893	0.7865	0.5458	0.5802	0.7879	1
MelSOD8	0.6131	0.6117	0.6074	0.6647	0.8796	0.6074	0.626	0.5372	0.6117	0.5959	0.6031	0.6346	0.8681	0.6103	0.5386	0.6074	0.1461	0.8424	0.8911	0.659	0.6074	0.6117	0.573	0.626	0.6074	0.6117	0.606	0.3022	0.8008	0.6532	0.6074	0.6088	0.52	0.6074	0.6045	0.6633	0.6017	0.6074	0.5071	0.6117	0.606	0.6117	1
	ClaSOD1	ClaSOD2	ClaSOD3	ClaSOD4	ClaSOD5	ClaSOD6	ClaSOD7	ClaSOD8	CpSOD1	CpSOD2	CpSOD3	CpSOD4	CpSOD5	CpSOD6	CpSOD7	CpSOD8	CpSOD9	CpSOD10	CsaSOD1	CsaSOD2	CsaSOD3	CsaSOD4	CsaSOD5	CsaSOD6	CsaSOD7	CsaSOD8	CsaSOD9	LsiSOD1	LsiSOD2	LsiSOD3	LsiSOD4	LsiSOD5	LsiSOD6	LsiSOD7	LsiSOD8	MelSOD1	MelSOD2	MelSOD3	MelSOD4	MelSOD5	MelSOD6	MelSOD7	MelSOD8
		IDENTITY STATS
		min = 12.89
		max = 99.28
		mean = 64.4140974529342
		stddev = 16.7783062632223
