# Supplementary material for: Genome-Wide Evolution and Comparative Analysis of Superoxide Dismutase Gene Family in Cucurbitaceae and Expression Analysis of Lagenaria siceraria Under Multiple Abiotic Stresses
Source: Front Genet. 2022 Feb 8;12:784878. doi: 10.3389/fgene.2021.784878 (PMC8861505; doi:10.3389/fgene.2021.784878)
Supplement: Supplementary file 6 [file Table6.XLSX]

## Sheet: collinearity relationships
Table S6 The collinearity analysis of SOD genes between five Cucurbitaceae species and arabidopsis (Citrullus lanatus, Cucurbita pepo, Cucumis sativus, Lagenaria siceraria, Cucumis melon)
	Arabidopsis and Cucurbita pepo
Location	Gene Name		Location	orthologous pair
Cp4.1LG01	Cp4.1LG01g03240.1	==	Chr5	at__AT5G51100
Cp4.1LG05	Cp4.1LG05g02890.1	==	Chr2	at__AT2G28190
Cp4.1LG08	Cp4.1LG08g07900.1	==	Chr1	at__AT1G12520
Cp4.1LG19	Cp4.1LG19g02010.1	==	Chr3	at__AT3G03860
Cp4.1LG19	Cp4.1LG19g02010.1	==	Chr5	at__AT5G18100
	Arabidopsis and Lagenaria siceraria
Location	Gene Name		Location	orthologous pair
chr01	Lsi01G016730.1	==	Chr5	at__AT5G18100
chr06	Lsi06G001840.1	==	Chr1	at__AT1G08830
chr07	Lsi07G013670.1	==	Chr1	at__AT1G12520
chr10	Lsi10G012210.1	==	Chr2	at__AT2G28190
	Arabidopsis and Cucumis melon
Location	Gene Name		Location	orthologous pair
chr02	MELO3C015374.2.1	==	Chr1	at__AT1G08830
chr06	MELO3C014007.2.1	==	Chr1	at__AT1G12520
chr08	MELO3C008809.2.1	==	Chr5	at__AT5G18100
chr11	MELO3C026955.2.1	==	Chr2	at__AT2G28190
	Citrullus lanatus and Cucumis sativu
Location	Gene Name		Location	orthologous pair
Cla97Chr02	Cla97C02G042100.1	==	chr2	CsaV3_2G004490.1
Cla97Chr02	Cla97C02G047680.1	==	chr6	CsaV3_6G014400.1
Cla97Chr03	Cla97C03G066780.1	==	chr1	CsaV3_1G039510.1
Cla97Chr03	Cla97C03G067030.1	==	chr1	CsaV3_1G039270.1
Cla97Chr04	Cla97C04G071940.1	==	chr4	CsaV3_4G013220.1
Cla97Chr07	Cla97C07G144240.1	==	chr4	CsaV3_4G004420.1
Cla97Chr10	Cla97C10G187890.1	==	chr3	CsaV3_3G003410.1
Cla97Chr11	Cla97C11G212830.1	==	chr6	CsaV3_6G002070.1
	Citrullus lanatus and Lagenaria siceraria
Location	Gene Name		Location	orthologous pair
Cla97Chr02	Cla97C02G047680.1	==	chr10	Lsi10G012210.1
Cla97Chr02	Cla97C02G042100.1	==	chr11	Lsi11G004820.1
Cla97Chr03	Cla97C03G066780.1	==	chr06	Lsi06G001840.1
Cla97Chr03	Cla97C03G067030.1	==	chr06	Lsi06G001600.1
Cla97Chr04	Cla97C04G071940.1	==	chr01	Lsi01G016730.1
Cla97Chr07	Cla97C07G144240.1	==	chr07	Lsi07G001390.1
Cla97Chr10	Cla97C10G187890.1	==	chr07	Lsi07G013670.1
	Cucurbita pepo and agenaria siceraria
Location	Gene Name		Location	orthologous pair
chr01	Lsi01G016730.1	==	Cp4.1LG19	Cp4.1LG19g02020.1
chr02	Lsi02G012110.1	==	Cp4.1LG02	Cp4.1LG02g11270.1
chr02	Lsi02G012110.1	==	Cp4.1LG20	Cp4.1LG20g07540.1
chr06	Lsi06G001840.1	==	Cp4.1LG11	Cp4.1LG11g09200.1
chr07	Lsi07G001390.1	==	Cp4.1LG01	Cp4.1LG01g03240.1
chr07	Lsi07G013670.1	==	Cp4.1LG08	Cp4.1LG08g07900.1
chr10	Lsi10G012210.1	==	Cp4.1LG05	Cp4.1LG05g02890.1
