# Supplementary material for: Genome-Wide Evolution and Comparative Analysis of Superoxide Dismutase Gene Family in Cucurbitaceae and Expression Analysis of Lagenaria siceraria Under Multiple Abiotic Stresses
Source: Front Genet. 2022 Feb 8;12:784878. doi: 10.3389/fgene.2021.784878 (PMC8861505; doi:10.3389/fgene.2021.784878)
Supplement: Supplementary file 8 [file Table4.XLSX]

## Sheet:  Cis- elements
Table S4. Cis-Acting elements of SOD genes family in five Cucurbitaceae species
Name	MBS	MRE	LTR	TC-rich repeats	ABRE	CGTCA-motif	TCA-element	ERE	ARE	Box 4	G-box	TGACG-motif	STRE	P-box
	Drought/salt stress	MYB binding site involved in light responsiveness	Low-temperature responsiveness	Defense and stress responsiveness	Drought/salt stress	MeJA-responsiveness	Aalicylic acid responsiveness	Ethylene-responsive element	Anaerobic induction	Light responsiveness	Light responsiveness	MeJA-responsiveness		Gibberellin-responsive element
Name	MBS	MRE	LTR	TC-rich repeats	ABRE	CGTCA-motif	TCA-element	ERE	ARE	Box 4	G-box	TGACG-motif	STRE	P-box
ClaSOD1	1				2		1	2	3		3		3	1
ClaSOD2	2		1		1			1	2		1
ClaSOD3		1	2	1	3	1		2	2	3	3	1	2
ClaSOD4				1			1		1	2			2	2
ClaSOD5	1					3		2	2	1		2
ClaSOD6	2	2	2	1	2	7	3	2	8	2	6	7	10	3
ClaSOD7		2	1	1			1	7	1				1	1
ClaSOD8			1		2	2		1	4	4	6	2	3	1
CpSOD1				1	2	3		4	4	1	1	3	1	1
CpSOD2					1		2	2	2	1	3
CpSOD3	2		1		3	2	1		5	2	1	1	6	2
CpSOD4		1	1		5	2	2	6	2	3	6	2	2	1
CpSOD5		2	1		1	1		2	1	2		1	2
CpSOD6	1		1	2	1	2	1	2	2	1	1	2	2
CpSOD7					8	1		2	10	2	8	1	14	2
CpSOD8	2		1	1	8			1		3	9		3
CpSOD9				1	1	1		3	4	1	3	1		1
CpSOD10	1	1			3	1		3		1		1
CsaSPD1	1				2	1		1	1	1	3	1	3
CsaSOD2	1				1		2		1		1			1
CsaSOD3		1			4		1	2	2	3	4		1
CsaSOD4				1	1				3		1		1
CsaSOD5		2	2		5	6	2	2	6	1	4	6	7	3
CsaSOD6		2			6		2	1		5	5		2	2
CsaSOD7	1		1		1	1	1	1	2	3	2	1	1	1
CsaSOD8	2	1		1				2	1				3
CsaSOD9			1	1	3	2		2	2	1	3	2	1	1
LsiSOD1								4	3			1	1
LsiSOD2						1	3	1		1			1	1
LsiSOD3			1	1		1			1	2		1	3	2
LsiSOD4		2			3	1		2		4	6	1	3
LsiSOD5		2				1		3	1	2	1	1
LsiSOD6			2		5	2	1	2	4	6	5	2	1
LsiSOD7	1							2					2
LsiSOD8							1		1					1
MelSOD1	1		1	1	3	1			1	1	3	1	2	1
MelSOD2			1		4			1	1	1	4		2
MelSOD3		1			1				4	1			2
MelSOD4	3			1	5	2	2	1	3	4	9	2	2	1
MelSOD5		2	2		1			1	1	1	2		2
MelSOD6			2	2		1	1		1	2		1	3
MelSOD7	1	1	1	2	1		2	2		1	1		1
MelSOD8				1	4	1	1	2			6	2	2
	23	23	26	20	93	47	31	74	92	69	111	46	97	29
	MBS	MRE	LTR	TC-rich repeats	ABRE	CGTCA-motif	TCA-element	ERE	ARE	Box 4	G-box	TGACG-motif	STRE	P-box
	43	45	49	38	180	93	60	143	176	133	215	91	187	55
