# Supplementary material for: Genome-Wide Evolution and Comparative Analysis of Superoxide Dismutase Gene Family in Cucurbitaceae and Expression Analysis of Lagenaria siceraria Under Multiple Abiotic Stresses
Source: Front Genet. 2022 Feb 8;12:784878. doi: 10.3389/fgene.2021.784878 (PMC8861505; doi:10.3389/fgene.2021.784878)
Supplement: Supplementary file 10 [file Table5.XLSX]

## Sheet: duplication events
Table S5. The number of different modes of duplication events (DSD, dispersed duplication;TRD, transposed duplication;WGD, whole-genome duplication) in five Cucurbitaceae species.
species name	Types of Duplications	Gene Name	Gene ID	Chr	Start	End	Gene Name	Gene ID	Chr	Start	End
Citrullus lanatus		ClaSOD1	Cla97C02G042100.1	Cla97Chr02:9948445	29948445	29950669	ClaSOD3	Cla97C03G066780.1	Cla97Chr03:312007	30312007	30314020	4.2e-62
		ClaSOD4	Cla97C03G067030.1	Cla97Chr03:528549	30528549	30533620	ClaSOD7	Cla97C07G144240.1	Cla97Chr07:1684506	31684506	31689090	3.6e-64
	TRD (transposed duplication)	ClaSOD6	Cla97C04G071940.1	Cla97Chr04:8573541	18573541	18578453	ClaSOD3	Cla97C03G066780.1	Cla97Chr03:312007	30312007	30314020	4.4e-54
		ClaSOD8	Cla97C10G187890.1	Cla97Chr10:896864	3896864	3901567	ClaSOD5	Cla97C02G030910.1	Cla97Chr02:894235	3894235	3895415	5.5e-06
Cucurbita pepo	TRD (transposed duplication)	CpSOD2	Cp4.1LG00g09240.1	Cp4.1LG00:28935603	28935603	28939259	CpSOD8	Cp4.1LG11g09200.1	Cp4.1LG11:7718961	771896	7722186	3e-53
		CpSOD3	Cp4.1LG00g14260.1	Cp4.1LG00:40154671	40154671	40154916	CpSOD8	Cp4.1LG11g09200.1	Cp4.1LG11:7718961	771896	7722186	1.4e-15
	WGD (whole-genome duplication)	CpSOD1	Cp4.1LG00g08890.1	Cp4.1LG00:28028303	28028303	28029262	CpSOD8	Cp4.1LG11g09200.1	Cp4.1LG11:7718961	7718961	7722186	1.4e-34
		CpSOD5	Cp4.1LG02g11270.1	Cp4.1LG02:10254434	10254434	10257174	CpSOD10	Cp4.1LG20g07540.1	Cp4.1LG20:8063773	8063773	8066502	4.6e-111
Cucumis sativus	DSD (dispersed duplication)	CsaSOD1	CsaV3_1G004740.1	chr1:3003867	3003867	3008300	CsaSOD2	CsaV3_1G039270.1	chr1:24721159	24721159	24727725	4.1e-25
		CsaSOD1	CsaV3_1G004740.1	chr1:3003867	3003867	3008300	CsaSOD6	CsaV3_4G004420.1	chr4:2773638	2773638	2778314	4.8e-26
		CsaSOD2	CsaV3_1G039270.1	chr1:24721159	24721159	24727725	CsaSOD6	CsaV3_4G004420.1	chr4:2773638	2773638	2778314	4.6e-62
		CsaSOD3	CsaV3_1G039510.1	chr1:24887785	24887778	24891484	CsaSOD8	CsaV3_6G014400.1	chr6:10443370	10443370	10447636	1e-50
	TRD (transposed duplication)	CsaSOD7	CsaV3_4G013220.1	chr4:9576323	9576323	9582309	CsaSOD4	CsaV3_2G004490.1	chr2:2426642	2426642	2430658	3.5e-54
Lagenaria siceraria	DSD (dispersed duplication)	LsiSOD1	Lsi01G016730.1	chr01:15271445	15271445	15282791	LsiSOD4	Lsi06G001840.1	chr06:1985233	1985233	1988789	1.2e-37
		LsiSOD1	Lsi01G016730.1	chr01:15271445	15271445	15282791	LsiSOD7	Lsi10G012210.1	chr10:16499663	16499663	16504945	8.8e-33
		LsiSOD1	Lsi01G016730.1	chr01:15271445	15271445	15282791	LsiSOD8	Lsi11G004820.1	chr11:5089329	5089329	5093919	1e-36
		LsiSOD2	Lsi02G012110.1	chr02:15632093	15632093	15637204	LsiSOD3	Lsi06G001600.1	chr06:1710508	1710508	1716036	5e-17
		LsiSOD3	Lsi06G001600.1	chr06:1710508	1710508	1716036	LsiSOD5	Lsi07G001390.1	chr07:1509250	1509250	1514918	2.5e-47
		LsiSOD4	Lsi06G001840.1	chr06:1985233	1985233	1988789	LsiSOD7	Lsi10G012210.1	chr10:16499663	16499663	16504945	3.2e-52
		LsiSOD4	Lsi06G001840.1	chr06:1985233	1985233	1988789	LsiSOD8	Lsi11G004820.1	chr11:5089329	5089329	5093919	1.9e-60
		LsiSOD7	Lsi10G012210.1	chr10:16499663	16499663	16504945	LsiSOD8	Lsi11G004820.1	chr11:5089329	5089329	5093919	3.8e-47
Cucumis melon	DSD (dispersed duplication)	MelSOD1	MELO3C015351.2.1	chr02:968654	968721	974446	MelSOD5	MELO3C017624.2.1	chr07:25736628	23551931	23556535	1.5e-50
		MelSOD1	MELO3C015351.2.1	chr02:968654	968721	974446	MelSOD8	MELO3C020487.2.1	chr12:194412	194354	197579	6.4e-22
		MelSOD6	MELO3C008809.2.1	chr08:26323351	24576582	24580898	MelSOD7	MELO3C026955.2.1	chr11:28918482	26124294	26128208	1.7e-46
	TRD (transposed duplication)	MelSOD3	MELO3C004342.2.1	chr05:26684685	26684685	2.66891e-08	MelSOD2	MELO3C015374.2.1	chr02:1149518	1149518	1152627	7.6e-56
