# Supplementary material for: Genome-Wide Evolution and Comparative Analysis of Superoxide Dismutase Gene Family in Cucurbitaceae and Expression Analysis of Lagenaria siceraria Under Multiple Abiotic Stresses
Source: Front Genet. 2022 Feb 8;12:784878. doi: 10.3389/fgene.2021.784878 (PMC8861505; doi:10.3389/fgene.2021.784878)
Supplement: Supplementary file 11 [file Table7.XLSX]

## Sheet: Function
Table S7 Biological process, Molecular function, Cellular componets of SOD gene family in Lagenaria siceraria
//
SN 1;
SD LsiSOD1;
SQ MPPNKTILLLFFNPKIPAMEIDFQSPETHVGAAASSVIKTSKFKGRSRGNNNGNKFVGVRQRPSGRWVAEIKDTTKKIRMWLGTFETAEEAARAYDEAACLLRGSNTRTNFIPQISTNSPIASRIRTLLNTKKTLNRKPLENPTTTTTSAAASAASAVADPTIQDDGLFDGAYKPDMTNCLEEREVSSCDSSCSVSCGLGVSLAENSEELELCAFERMKVERQISASLYAINGVQEYMEATTEMGALKAVALITGGDSNIKGSIQFVQDSNGTGATHVNGRISGLSPGLHGFHIHALGDTTNGCNSTGPHFNPLKKDHGGPGDAERHVSLKGPHSILGRAVVVHADPDDLGKGGHELSKTTGNAGARVGCVNVGKICQFQAGNLVNFQNSAKLLER…
CP Mitochondrial;
MF oxidoreductase activity;
MF ion binding;
MF protein binding;
MF enzyme binding;
MF nucleic acid binding transcription factor activity;
MF DNA binding;
BP response to stress;
BP reproduction;
BP biosynthetic process;
BP cellular nitrogen compound metabolic process;
BP homeostatic process;
BP anatomical structure development;
BP transport;
BP signal transduction;
CC intracellular;
CC cell;
CC cytoplasm;
CC extracellular region;
CC organelle;
CC cytosol;
CC nucleus;
CC mitochondrion;
CC extracellular space;
//
SN 2;
SD LsiSOD2;
SQ MALRSLCRKNLTPTISGALGSGHFRGLQTFSLPDLPYDYGALEPVINAEIMQLHHQKHHQAYITNYNKALEQLHEAINKGHTSTVVKLQSAIKFNGGGHINHSIFWNNLAPIHEGGGEPPKGSLGWAIDSQFGSLEALIQRVNAEGAALQGSGWVWLALDKELKKLSVETTANQDPLVTKGSALVPLLGIDVWEHAYYLQYKNVRPDYLKNIWKVINWKYAAETLENGGHELLLSDDFVRNCMEMCSISSGRSEPNLKHLNIIDPLKENNNLGRSVSRGKLVNDIYNFVAES;
CP Cytoplasmic;
CP Mitochondrial;
CP Chloroplast;
MF oxidoreductase activity;
MF ion binding;
MF DNA binding;
BP response to stress;
BP reproduction;
BP embryo development;
BP anatomical structure development;
BP mitochondrion organization;
BP aging;
CC intracellular;
CC cell;
CC cytoplasm;
CC mitochondrion;
CC organelle;
CC plastid;
//
SN 3;
SD LsiSOD3;
SQ MISCCNPMNVSSPLLLTNSSQQLKSTKHPYLYQSKLHKTSSDVTTKGMKVFAYYGLKTPPYELDALEPYMSQRTLEVHWGKHHRNYVEGLNKQLSQNDILYGHTLDELLKVTYNNGNPLPEFNNAAQVWNHDFFWESMQPGGGNMPKLGVLQQIEKDFGSFINFRDKFIQASLSLFGSGWVWLVLKRQEKRLAVITTSNAISPLLWDDIVSQCPILCTSVGAYGPSRVFREFRRAENSCSVITFIDTRVTRKWSNEATEGISKPHVCDQVPFQV;
CP Extracellular;
MF oxidoreductase activity;
MF ion binding;
MF DNA binding;
BP response to stress;
BP mitochondrion organization;
BP aging;
BP anatomical structure development;
BP reproduction;
BP embryo development;
CC intracellular;
CC cell;
CC cytoplasm;
CC plastid;
CC organelle;
CC mitochondrion;
//
SN 4;
SD LsiSOD4;
SQ MVKAVAVLGSSEGVSGTIFFSQEGDGPTTVTGTVSGLKPGLHGFHVHALGDTTNGCISTGPHFNPAGKVHGAPEDVNRHAGDLGNITAGEDGKASFTITDCQIPLSGHDSIVGRAVVVHGDPDDLGKGGHELSLSTGNAGARVACGIIGLQG;
CP Cytoplasmic;
MF oxidoreductase activity;
MF ion binding;
MF protein binding;
MF enzyme binding;
BP response to stress;
BP aging;
BP homeostatic process;
BP reproduction;
BP transport;
BP anatomical structure development;
CC intracellular;
CC cell;
CC cytoplasm;
CC extracellular region;
CC cytosol;
CC organelle;
CC plastid;
CC nucleus;
CC mitochondrion;
CC extracellular space;
CC plasma membrane;
//
SN 5;
SD LsiSOD5;
SQ MASIALPPSTKLQQNLLHSSFRGSPLPPSAISCSSNKQKQHVSKTCLTKITAKFDLKPPPYPLDALEPHMSRSTLEYHWGKHHRAYVDNLNRQIEGTELEELSLEDIITKTYNKGDILPQFNNAAQIWNHDFLWESIKPGGGGKPSGELLELIERDFGSFEKFLEEFKSAAATQFGSGWAWLAYKDNTVDHPRPSEKDRKLVILKSPNAVNPLVWDYANRRPDYISTFVSNLISWEAADLRLQKAKVEAAERAKEKEKKKEKKKAEGSDEEVYVDSSSSESDSDSD;
CP Chloroplast;
CP Nuclear;
MF oxidoreductase activity;
MF ion binding;
MF DNA binding;
BP response to stress;
BP aging;
BP anatomical structure development;
BP reproduction;
BP embryo development;
CC intracellular;
CC cell;
CC cytoplasm;
CC plastid;
CC organelle;
CC mitochondrion;
//
SN 6;
SD LsiSOD6;
SQ MNYSLFNCSRILPVSLTNVERKIRKKENSLLMAFLRSTATTTSLAIAASALPAAFIFTGPSSSSFPFHFPQSFKPNSLSLHSSPFPTPNSFGFVRNFATPPSAVRMEIPTSESISSSQTEYMVDMKCEGCVNGVKNKLQGVDGVKSVDVDLSNQVVRILGTTPVKTMTEALEQTGRKARLIGQGVPEDFLVSAAVAEFKGPNIFGVVNMELARVEANFSGLSPGKHGWSINEFGDLTRGAASTGKIFGSADSGPSNEPLGDLGTLDADEKGEAFFSGVKQKLRVSDLIGRSIAVYGTEDKSDPGIAGAVVARSAGVGENYKKLCTCDGTTIWESSDKDFVTSKV;
CP Chloroplast;
MF oxidoreductase activity;
MF ion binding;
MF protein binding;
MF enzyme binding;
BP transport;
BP response to stress;
BP reproduction;
BP aging;
BP homeostatic process;
CC intracellular;
CC cell;
CC nucleus;
CC cytoplasm;
CC mitochondrion;
CC cytosol;
CC organelle;
CC plastid;
CC extracellular region;
CC extracellular space;
CC plasma membrane;
CC protein complex;
//
SN 7;
SD LsiSOD7;
SQ MNLGAQIYWKPPISHYPIIIDTMAAQSLLSASLSHYYIALPPFSNSSPPPSLSLSSSFHGASLKLPRHSLSLAASVAPKPLAVVAATKKAVAVLKGTSSVEGVVTLTQEDDGPTTVNVRVTGLTEGLHGFHLHEFGDTTNGCISTGPHFNPNKLTHGAPEDEIRHAGDLGNIIANADGVAEATIVDNQIPLSGPNSVVGRAFVVHELEDDLGKGGHELSSTTGNAGGRLACGVVGLTPM;
CP Chloroplast;
MF oxidoreductase activity;
MF ion binding;
MF protein binding;
MF enzyme binding;
BP response to stress;
BP homeostatic process;
BP reproduction;
BP aging;
BP transport;
CC intracellular;
CC cell;
CC cytoplasm;
CC plastid;
CC organelle;
CC extracellular region;
CC cytosol;
CC extracellular space;
CC nucleus;
CC mitochondrion;
CC plasma membrane;
CC protein complex;
//
SN 8;
SD LsiSOD8;
SQ MVKAVAVLESNQGVSGTVFFSQNGNGPTTVTGNISGLKAGLHGFHVHAFGDTTNGCLSTGPHFNPEGKDHGAPDDENRHVGDLGNLVAGDDGTATFSIIDKQISLVGPNSVLGRSIVVHADPDDLGRGRTELSLTTGNAGERIGCGKRYWAARVMEYTSTCMVYNDEVQCM;
CP Extracellular;
CP Cytoplasmic;
MF oxidoreductase activity;
MF ion binding;
MF protein binding;
MF enzyme binding;
BP response to stress;
BP aging;
BP reproduction;
BP transport;
BP homeostatic process;
BP anatomical structure development;
CC intracellular;
CC cell;
CC cytoplasm;
CC organelle;
CC extracellular region;
CC cytosol;
CC plastid;
CC extracellular space;
CC nucleus;
CC mitochondrion;
CC plasma membrane;
CC protein complex;
//

## Sheet: GO Id
Table S7 Gene ID and go ID of SOD gene family in Lagenaria siceraria
Gene ID	Gos ID
LsiSOD1	GO:0000302,GO:0003674,GO:0003676,GO:0003677,GO:0003700,GO:0005488,GO:0005575,GO:0005622,GO:0005623,GO:0005634,GO:0006355,GO:0006950,GO:0006979,GO:0007275,GO:0008150,GO:0009719,GO:0009723,GO:0009725,GO:0009791,GO:0009877,GO:0009889,GO:0009891,GO:0009893,GO:0009987,GO:0010033,GO:0010035,GO:0010038,GO:0010468,GO:0010556,GO:0010557,GO:0010604,GO:0010628,GO:0019219,GO:0019222,GO:0022622,GO:0031323,GO:…
LsiSOD2	GO:0000302,GO:0000303,GO:0000305,GO:0003674,GO:0003824,GO:0004784,GO:0005575,GO:0005622,GO:0005623,GO:0005737,GO:0005739,GO:0005759,GO:0006801,GO:0006950,GO:0006979,GO:0008150,GO:0008152,GO:0009636,GO:0009987,GO:0010035,GO:0016209,GO:0016491,GO:0016721,GO:0019430,GO:0031974,GO:0033554,GO:0034599,GO:0034614,GO:0042221,GO:0043226,GO:0043227,GO:0043229,GO:0043231,GO:0043233,GO:0044237,GO:0044422,GO:…
LsiSOD3	GO:0000302,GO:0000303,GO:0000305,GO:0003674,GO:0003824,GO:0004784,GO:0005575,GO:0005622,GO:0005623,GO:0005737,GO:0006801,GO:0006950,GO:0006979,GO:0008150,GO:0008152,GO:0009295,GO:0009507,GO:0009532,GO:0009536,GO:0009570,GO:0009579,GO:0009636,GO:0009987,GO:0010035,GO:0016209,GO:0016491,GO:0016721,GO:0019430,GO:0033554,GO:0034599,GO:0034614,GO:0042221,GO:0042644,GO:0042646,GO:0043226,GO:0043227,GO:…
LsiSOD4	GO:0000302,GO:0000303,GO:0000305,GO:0003674,GO:0003824,GO:0004784,GO:0005488,GO:0005507,GO:0005575,GO:0005576,GO:0005615,GO:0005622,GO:0005623,GO:0005737,GO:0006801,GO:0006950,GO:0006979,GO:0008150,GO:0008152,GO:0008270,GO:0009636,GO:0009987,GO:0010035,GO:0016209,GO:0016491,GO:0016721,GO:0019430,GO:0033554,GO:0034599,GO:0034614,GO:0042221,GO:0043167,GO:0043169,GO:0044237,GO:0044421,GO:0044424,GO:…
LsiSOD5	GO:0000302,GO:0000303,GO:0000305,GO:0003674,GO:0003824,GO:0004784,GO:0005575,GO:0005622,GO:0005623,GO:0005737,GO:0006801,GO:0006950,GO:0006979,GO:0008150,GO:0008152,GO:0009295,GO:0009314,GO:0009411,GO:0009416,GO:0009507,GO:0009532,GO:0009536,GO:0009570,GO:0009579,GO:0009628,GO:0009636,GO:0009987,GO:0010035,GO:0016209,GO:0016491,GO:0016721,GO:0019430,GO:0033554,GO:0034599,GO:0034614,GO:0042221,GO:…
LsiSOD6	GO:0003674,GO:0005488,GO:0005507,GO:0005575,GO:0005622,GO:0005623,GO:0005737,GO:0006873,GO:0006875,GO:0006878,GO:0008047,GO:0008150,GO:0008270,GO:0009507,GO:0009532,GO:0009536,GO:0009570,GO:0009987,GO:0016530,GO:0016531,GO:0016532,GO:0019725,GO:0030003,GO:0030234,GO:0042592,GO:0043085,GO:0043167,GO:0043169,GO:0043226,GO:0043227,GO:0043229,GO:0043231,GO:0044093,GO:0044422,GO:0044424,GO:0044434,GO:…
LsiSOD7	GO:0000302,GO:0000303,GO:0000305,GO:0001101,GO:0003674,GO:0003824,GO:0004784,GO:0005488,GO:0005507,GO:0005575,GO:0005576,GO:0005615,GO:0005622,GO:0005623,GO:0005737,GO:0006801,GO:0006950,GO:0006970,GO:0006979,GO:0008150,GO:0008152,GO:0008270,GO:0009314,GO:0009411,GO:0009416,GO:0009507,GO:0009532,GO:0009536,GO:0009570,GO:0009579,GO:0009628,GO:0009636,GO:0009642,GO:0009651,GO:0009743,GO:0009744,GO:…
LsiSOD8	GO:0000302,GO:0000303,GO:0000305,GO:0001101,GO:0003674,GO:0003824,GO:0004784,GO:0005488,GO:0005507,GO:0005575,GO:0005576,GO:0005615,GO:0005622,GO:0005623,GO:0005634,GO:0005737,GO:0005829,GO:0006801,GO:0006950,GO:0006952,GO:0006970,GO:0006979,GO:0008150,GO:0008152,GO:0008270,GO:0009314,GO:0009411,GO:0009416,GO:0009605,GO:0009607,GO:0009617,GO:0009628,GO:0009636,GO:0009642,GO:0009651,GO:0009743,GO:…
