# Supplementary material for: Genome-Wide Evolution and Comparative Analysis of Superoxide Dismutase Gene Family in Cucurbitaceae and Expression Analysis of Lagenaria siceraria Under Multiple Abiotic Stresses
Source: Front Genet. 2022 Feb 8;12:784878. doi: 10.3389/fgene.2021.784878 (PMC8861505; doi:10.3389/fgene.2021.784878)
Supplement: Supplementary file 12 [file Table8.XLSX]

## Sheet: miRNA types
Table S8. List of miRNA found in LsiSOD genes
	Lsi-miRN1740	Lsi-miR164a	Lsi-miR164b	Lsi-miR164c	Lsi-miR164f	Lsi-miRN1741
LsiSOD7	4.5
LsiSOD6		5	5	5	5
LsiSOD3						5
miRNA_Acc.	Target_Acc.	Expectation	UPE$	miRNA_start	miRNA_end	Target_start	Target_end	miRNA_aligned_fragment	alignment	Target_aligned_fragment	Inhibition	Target_Desc.	Multiplicity
Lsi-miRN1740	LsiSOD7	4.5	-1	1	21	692	712	GAUUCAGCCCUUCGUCGCUCC	: .::: :: :::::::: ::	GUGGCGUCGUAGGGCUGACUC	Cleavage		1
Lsi-miR164a	LsiSOD6	5	-1	1	21	169	189	UGGAGAAGCAGGGCACGUGCA	: ::: ::::: :::::.:	UUCACCGGCCCUUCUUCUUCU	Cleavage		1
Lsi-miR164b	LsiSOD6	5	-1	1	21	169	189	UGGAGAAGCAGGGCACGUGCA	: ::: ::::: :::::.:	UUCACCGGCCCUUCUUCUUCU	Cleavage		1
Lsi-miR164c	LsiSOD6	5	-1	1	21	169	189	UGGAGAAGCAGGGCACGUGCA	: ::: ::::: :::::.:	UUCACCGGCCCUUCUUCUUCU	Cleavage		1
Lsi-miR164f	LsiSOD6	5	-1	1	21	169	189	UGGAGAAGCAGGGCACGUGCU	::: ::::: :::::.:	UUCACCGGCCCUUCUUCUUCU	Cleavage		1
Lsi-miRN1741	LsiSOD3	5	-1	1	21	759	779	CCCUUCGUCGCUCCGAUUCGU	: :: :::::::.::::	GUCCAACGAAGCGACGGAGGG	Cleavage		1
Lsi-MIR164a	PmiREN010355	MIR164	Lagenaria siceraria	Lsi-MIMD01000019.1	335620	335750	-	AAGGTGCGTGCAGATCAGGATGGAGAAGCAGGGCACGTGCATTACTCACTCATCTAGCGAAGCCACGTGGCCGCCGCTGAGTGGGTTGTTCATGTGCCCGTCTTCCCCATCGTGACCACTGCAACCTTGTT	.........((((.(((.(((((.((((..(((((((((.((.(((((((((....(((..(((....))))))...))))))))).)).)))))))))..)))).))))).)))...)))).........	335640	335730	TGGAGAAGCAGGGCACGTGCATTACTCACTCATCTAGCGAAGCCACGTGGCCGCCGCTGAGTGGGTTGTTCATGTGCCCGTCTTCCCCATC	(((.((((..(((((((((.((.(((((((((....(((..(((....))))))...))))))))).)).)))))))))..)))).)))..	Lsi-miR164a	335710	335730	TGGAGAAGCAGGGCACGTGCA	Lsi-miR164a*	335640	335660	CATGTGCCCGTCTTCCCCATC		3
Lsi-MIR164b	PmiREN010356	MIR164	Lagenaria siceraria	Lsi-MIMD01000030.1	1166281	1166397	-	ACTGGGCGAGAGAATCCTGCTGGAGAAGCAGGGCACGTGCAAGGCACATGCCTTTATCATCCCCCACCCTCCTCTGCACGTGCTCCCTTTCTCCAACATGCCTCTCTCACTCTTACA	...(((.((((((..(.((.((((((((..(((((((((((((((....)))).....................)))))))))))..)))))))).)).)..)))))).))).....	1166301	1166377	TGGAGAAGCAGGGCACGTGCAAGGCACATGCCTTTATCATCCCCCACCCTCCTCTGCACGTGCTCCCTTTCTCCAAC	((((((((..(((((((((((((((....)))).....................)))))))))))..))))))))..	Lsi-miR164b	1166357	1166377	TGGAGAAGCAGGGCACGTGCA	Lsi-miR164b*	1166301	1166321	CACGTGCTCCCTTTCTCCAAC		3
Lsi-MIR164c	PmiREN010357	MIR164	Lagenaria siceraria	Lsi-MIMD01000050.1	1774032	1774138	-	GTGGGTGAGGAAGTTCTTGTTGGAGAAGCAGGGCACGTGCAAACTCATCCATTTCTATACCCTTTGCACGTGCTCCCCTTCTCCAACATGGCTTCCTCACCTTTATT	..(((((((((((((..(((((((((((..(((((((((((((...................)))))))))))))..))))))))))).))))))))))))).....	1774052	1774118	TGGAGAAGCAGGGCACGTGCAAACTCATCCATTTCTATACCCTTTGCACGTGCTCCCCTTCTCCAAC	((((((((..(((((((((((((...................)))))))))))))..))))))))..	Lsi-miR164c	1774098	1774118	TGGAGAAGCAGGGCACGTGCA	Lsi-miR164c*	1774052	1774072	CACGTGCTCCCCTTCTCCAAC		3
Lsi-MIR164f	PmiREN010360	MIR164	Lagenaria siceraria	Lsi-MIMD01000184.1	1444152	1444388	-	AAGGTGCATGAAGAACAAGATGGAGAAGCAGGGCACGTGCTGCACTAACTCAATTTCTCAAATGCAATTCAAAAATCCCACCTTTTTTTTCCTTTTTTTTTTTTTTTAATTTTTGAATTAAGAGATTTTGAAGGGGGAAAAAAGGGTTTTTTTTTAATTTTTTTTTTTTTTTAATTTTAATTTTGAGTTAGTTCTTCATGTGCCCCTCTTCACCATCAAGACCACTGCACCTTAATT	((((((((..........(((((.((((..(((((((((..(.((((((((((......((((..((((.(((((....((((((((((((((((((....((((((((((....))))))))))....))))))))))))))))))..))))).))))..............)))).....)))))))))).)..)))))))))..)))).)))))........))))))))....	1444172	1444368	TGGAGAAGCAGGGCACGTGCTGCACTAACTCAATTTCTCAAATGCAATTCAAAAATCCCACCTTTTTTTTCCTTTTTTTTTTTTTTTAATTTTTGAATTAAGAGATTTTGAAGGGGGAAAAAAGGGTTTTTTTTTAATTTTTTTTTTTTTTTAATTTTAATTTTGAGTTAGTTCTTCATGTGCCCCTCTTCACCATC	(((.((((..(((((((((..(.((((((((((......((((..((((.(((((....((((((((((((((((((....((((((((((....))))))))))....))))))))))))))))))..))))).))))..............)))).....)))))))))).)..)))))))))..)))).)))..	Lsi-miR164f	1444348	1444368	TGGAGAAGCAGGGCACGTG
Lsi-MIRN1740	PmiREN010387	MIRN1740	Lagenaria siceraria	Lsi-MIMD01000063.1	1267493	1267641	+	TCGTAACGTAATTCCCACCGAGCGGCGGGTAGAGTCCTTTGCAGAGTACTTAAATACACGATAGGGTATTGTAAGTGGCAGCGTGGCCTTGCTGCAATGATCCACTAAGATTCAGCCCTTCGTCGCTCCAATTCATCCCTCCCCACACA	...................(((((((((((.(((((..........(((((((((((.(.....)))))).))))))((((((......)))))).............))))).))))...))))))).....................	1267513	1267621	AGCGGCGGGTAGAGTCCTTTGCAGAGTACTTAAATACACGATAGGGTATTGTAAGTGGCAGCGTGGCCTTGCTGCAATGATCCACTAAGATTCAGCCCTTCGTCGCTCC	((((((((((.(((((..........(((((((((((.(.....)))))).))))))((((((......)))))).............))))).))))...))))))..	Lsi-miRN1740	1267601	1267621	GATTCAGCCCTTCGTCGCTCC	Lsi-miRN1740*	1267513	1267533	AGCGGCGGGTAGAGTCCTTTG		3
Lsi-MIRN1741	PmiREN010389	MIRN1741	Lagenaria siceraria	Lsi-MIMD01000098.1	3312594	3312792	-	ACTAAATTGAAACTCTTGACGAAAGAGTCGCGGGGGTCATCTTGTAACGTAACTCCCACCGAGTGGCAGATAGAATTCTTTGTAAATGACTTAAATACACAACAGGGTTTTGTAAGTAGCAAAGGAGCCTTGCCACCATAAAATCTACTAAGATTCAACCCTTCGTCGCTCCGATTCGTAATTAGACTAAATTGAAACC	.............(((..(((((.((((.((((((((.((((((((.....((((.....))))((((...((..((((((((.....(((((...((........))....))))).))))))))..))))))...........))).)))))...)))).)))).))))...)))))....))).............	3312614	3312772	GAAAGAGTCGCGGGGGTCATCTTGTAACGTAACTCCCACCGAGTGGCAGATAGAATTCTTTGTAAATGACTTAAATACACAACAGGGTTTTGTAAGTAGCAAAGGAGCCTTGCCACCATAAAATCTACTAAGATTCAACCCTTCGTCGCTCCGATTCGT	(((.((((.((((((((.((((((((.....((((.....))))((((...((..((((((((.....(((((...((........))....))))).))))))))..))))))...........))).)))))...)))).)))).))))...)))..	Lsi-miRN1741	3312614	3312634	CCCTTCGTCGCTCCGATTCGT	Lsi-miRN1741*	3312752	3312772	GAAAGAGTCGCGGGGGTCATC		3
miRNA Shoot
Lsi-miR164a*	1.24371
Lsi-miR164b*	0.124371
Lsi-miR164c*	0.248742
Lsi-miR164f*	1.24371
Lsi-miRN1740*	0
Lsi-miRN1741*	0
